# Supplementary material for: Gender differences in the effects of cardiovascular drugs
Source: Oxford University Press journal article supplement (doi:10.1093/ehjcvp/pvw042), 2016-12-05
Supplement: pvw042_supp.doc [file pvw042_supp.doc]

**Supplemental Table 1. Gender differences in absorption, distribution, metabolism, and excretion**

Cl: clearance. E: estrogens. GFR: glomerular filtration rate. GI: gastrointestinal. M: men. OCP: oral contraceptives. P: pregnancy. P-gp: P-glycoprotein. Vd: volume of distribution. W: women.

**References**

1. Soldin OP, Chung S, Mattison. Sex differences in drug disposition. *J Biomed Biotechnol* 2011;**2011**:187103.
2. Soldin OP, Mattison. Sex differences in pharmacokinetics and pharmacodynamics. *Clin Pharmacokinet* 2009;**48**:143-158.
3. [Freire AC](http://www.ncbi.nlm.nih.gov/pubmed?term=Freire AC%5BAuthor%5D&cauthor=true&cauthor_uid=21640175), [Basit AW](http://www.ncbi.nlm.nih.gov/pubmed?term=Basit AW%5BAuthor%5D&cauthor=true&cauthor_uid=21640175), [Choudhary R](http://www.ncbi.nlm.nih.gov/pubmed?term=Choudhary R%5BAuthor%5D&cauthor=true&cauthor_uid=21640175), [Piong CW](http://www.ncbi.nlm.nih.gov/pubmed?term=Piong CW%5BAuthor%5D&cauthor=true&cauthor_uid=21640175), [Merchant HA](http://www.ncbi.nlm.nih.gov/pubmed?term=Merchant HA%5BAuthor%5D&cauthor=true&cauthor_uid=21640175). Does sex matter? The influence of gender on gastrointestinal physiology and drug delivery. *Int J Pharm* 2011;**415**:15-28.
4. Kimura T, Higaki K. Gastrointestinal transit and drug absorption. *Biol Pharm Bull* 2002;**25**:149-164.
5. Mearadji B, Penning C, Vu MK, van der Schaar PJ, van Petersen AS, Kamerling IM, Masclee AA. Influence of gender on proximal gastric motor and sensory function. *Am J Gastroenterol* 2001;**96**:2066–2073.
6. Sadik R, Abrahamsson H, Stotzer PO. Gender differences in gut transit shown with a newly developed radiological procedure. *Scand J Gastroenterol* 2003;**38**:36–42.
7. Harris RZ, Benet LZ, Schwartz JB. Gender effects in pharmacokinetics and pharmacodynamics. *Drugs* 1995;**50**:222-239.
8. Beierle I, Meibohm B, Derendorf H. Gender differences in pharmacokinetics and pharmacodynamics. *Int J Clin Pharmacol Ther* 1999;**37**:529–547.
9. Legato M. Gender and the heart: sex-specific differences in normal anatomy and physiology. *J Gend Specif Med* 2000;**3**:15–18.
10. Meibohm B, Beierle I, Derendorf H. How important are gender differences in pharmacokinetics? *Clin Pharmacokinet* 2002;**41**:329-342.
11. Anderson GD. Sex and racial differences in pharmacological response: where is the evidence? Pharmacogenetics, pharmacokinetics, and pharmacodynamics. *J Womens Health (Larchmt)* 2005;**14**:19–29.
12. Gandhi M, Aweeka F, Greenblatt RM, Blaschke TF. Sex differences in pharmacokinetics and pharmacodynamics. *Annu Rev Pharmacol Toxicol* 2004;**44**:499-523.
13. Nicolas J-M, Espie P, Molimard M. Gender and interindividual variability in pharmacokinetics. *Drug Metabolism Rev* 2009;**41**:408-421.
14. Franconi F, Campese I. Pharmacogenomics, pharmacokinetics and pharmacodynamics: interaction with biological differences between men and women. *Br J Clin Pharmacol* 2014;**171**:580-594.
15. Haram K, Augensen K, Elsayed S. Serum protein pattern in normal pregnancy with special reference to acute phase reactants. *Br J Obstet Gynaecol* 1983;**90**:139-144.
16. Succari M, Foglietti MJ, Percheron F. Microheterogeneity of alpha 1-acid glycoprotein: variation during the menstrual cycle in healthy women, and profile in women receiving estrogenprogestogen treatment. *Clin Chim Acta* 1990;**187**:235–241.
17. Kishino S, Nomura A, Itoh S, Nakagawa T, Takekuma Y, Sugawara M, Furukawa H, Todo S, Miyazaki K. Age- and gender-related differences in carbohydrate concentrations of alpha1-acid glycoprotein variants and the effects of glycoforms on drug binding capacities. *Eur J Clin Pharmacol* 2002;**58**:621–628.
18. Wiegratz I, Kutschera E, Lee JH, Moore C, Mellinger U, Winkler UH, Kuhl H. Effect of four different oral contraceptives on various sex hormones and serum-binding globulins. *Contraception* 2003;**67**:25-32.
19. Schuetz EG, Furuya KN, Schuetz JD. Interindividual variation in expression of P-glycoprotein in normal human liver and secondary hepatic neoplasms. *J Pharmacol Exp Ther* 1995;**275**:1011-1018.
20. Davis M. Gender differences in p-glycoprotein: drug toxicity and response. *J Clin Oncol* 2005;**23**:6439–6440.
21. Schwartz JB. The current state of knowledge on age, sex, and their interactions on clinical pharmacology. *Clin Pharmacol Ther* 2007;**82**:87‑96.
22. Urakami Y, Okuda M, Saito H, Inui K. Hormonal regulation of organic cation transporter OCT2 expression in rat kidney. *FEBS Lett* 2000;**473**:173.
23. Bock KW, Schrenk D, Forster A, Griese EU, Mörike K, Brockmeier D, Eichelbaum M. The influence of environmental and genetic factors on CYP2D6, CYP1A2 and UDP-glucuronosyltransferases in man using sparteine, caffeine, and paracetamol as probes. *Pharmacogenetics* 1994;**4**:209-218.
24. Relling MV, Lin JS, Ayers GD, Evans WE. Racial and gender differences in N-acetyltransferase, xanthine oxidase, and CYP1A2 activities. *Clin Pharmacol Ther* 1992;**52**:643-658.
25. Kashuba AD, Nafziger AN. Physiological changes during the menstrual cycle and their effects on the pharmacokinetics and pharmacodynamics of drugs. *Clin Pharmacokinet* 1998;**34**:203–218.
26. Oertelt-Prigione S, Regitz-Zagrosek V. Gender aspects in cardiovascular pharmacology. *J Cardiovasc Trans Res* 2009;**2**:258-266.
27. [Zanger UM](http://www.ncbi.nlm.nih.gov/pubmed/?term=Zanger UM%5BAuthor%5D&cauthor=true&cauthor_uid=23333322), [Schwab M](http://www.ncbi.nlm.nih.gov/pubmed/?term=Schwab M%5BAuthor%5D&cauthor=true&cauthor_uid=23333322). Cytochrome P450 enzymes in drug metabolism: regulation of gene expression, enzyme activities, and impact of genetic variation. *Pharmacol Ther* 2013;**138**:103-141.
28. Anderson GD. Sex differences in drug metabolism: cytochrome P-450 and uridine diphosphate glucuronosyltransferase. *J Gend Specif Med* 2002;**5**:25-33.
29. Lucas D, Menez C, Girre C, Berthou F, Bodenez P, Joannet I, et al. Cytochrome P450 2E1 genotype and chlorzoxazone metabolism in healthy and alcoholic Caucasian subjects. *Pharmacogenetics* 1995;**5**:298–304.
30. Laine K, Tybring G, Bertilsson L. No sex-related differences but significant inhibition by oral contraceptives of CYP2C19 activity as measured by the probe drugs mephenytoin and omeprazole in healthy Swedish white subjects. *Clin Pharmacol Ther* 2000;**68**:151–159.
31. Hagg S, Spigset O, Dahlqvist R. Influence of gender and oral contraceptives on CYP2D6 and CYP2C19 activity in healthy volunteers. *Br J Clin Pharmacol* 2001;**51**:169-173.
32. Cotreau MM, von Moltke LL, Greenblatt DJ. The influence of age and sex on the clearance of cytochrome P450 3A substrates. *Clin Pharma*cokinet 2005;**44**:33-60.
33. Wolbold R, Klein K, Burk O, Nüssler AK, Neuhaus P, Eichelbaum M, Schwab M, Zanger UM. Sex is a major determinant of CYP3A4 expression in human liver. *Hepatology* 2003;**38**:978–988.
34. Labbé L, Sirois C, Pilote S, Arseneault M, Robitaille NM, Turgeon J, Hamelin BA. Effect of gender, sex hormones, time variables and physiological urinary pH on apparent CYP2D6 activity as assessed by metabolic ratios of marker substrates. *Pharmacogenetics* 2000;**10**:425–438.
35. Hogstedt S, Lindberg B, Rane A. Increased oral clearance of metoprolol in pregnancy. *Eur J Clin Pharmacol* 1983;**24**:217–220.
36. Wadelius M, Darj E, Frenne G, Rane A. Induction of CYP2D6 in pregnancy. *Clin Pharmacol Ther* 1997;**62**:400–407.
37. Jochmann N, Stangl K, Garbe E, Baumann G, Stangl V. Female-specific aspects in the pharmacotherapy of chronic cardiovascular diseases. *Eur Heart J* 2005;**26**:1585–1595.
38. Franconi F, Carru C, Malorni W, Vella S, Mercuro G. The Effect of Sex/Gender on Cardiovascular Pharmacology. *Curr Pharm Des* 2011;**17**:1095-1107.
39. Court MH, Duan SX, von Moltke LL, Greenblatt DJ, Patten CJ, Miners JO, Mackenzie PI. Interindividual variability in acetaminophen glucuronidation by human liver microsomes: identification of relevant acetaminophen UDPglucuronosyltransferase isoforms. *J Pharmacol Exp Ther* 2001;**299**:998-1006..
40. Boudikova B, Szumlanski C, Maidak B, Weinshilboum R. Human liver catechol-O-methyltransferase pharmacogenetics. *Clin Pharmacol Ther* 1990;**48**:381–389.
41. Zimmer KR, Lencina CL, Zimmer AR, Thiesen FV. Influence of physical exercise and gender on acetylcholinesterase and butyrylcholinesterase activity in human blood samples. *Int J Environ Health Res* 2010;**22**:279–286.
42. Baraona E, Abittan CS, Dohmen K, Moretti M, Pozzato G, Chayes ZW, Schaefer C, Lieber CS. Gender differences in pharmacokinetics of alcohol. *Alcohol Clin Exp Res* 2001;**25**:502-507.
43. Frezza M, di Padova C, Pozzato G, Terpin M, Baraona E, Lieber CS. High blood alcohol levels in women. The role of decreased gastric alcohol dehydrogenase activity and first-pass metabolism. *N Engl J Med* 1990;**322**:95-99.
44. Berg UB. Differences in decline in GFR with age between males and females: reference data on clearances of inulin and PAH in potential kidney donors. *Nephrol Dial Transplant* 2006;**21**:2577-2582
45. Davison JM, Dunlop W. Renal hemodynamics and tubular function normal human pregnancy. *Kidney Int* 1980;**18**:152-161.

**Supplemental Table 2. Sex-related differences in drug pharmacokinetic parameters**

| **Drug class** | **Outcomes in females** |
| --- | --- |
| Anesthetics: Propofol | Plasma propofol levels decline more rapidly in W at the end of infusion1-5. |
| Alcohol | Lower gastric alcohol dehydrogenase activity in W. Higher plasma concentrations in W as compared to M following an equivalent drink6. |
| Antidepressants | Higher AUC and Cmax in W7. |
| H1-Antihistamines | Slower metabolism and elimination in W8,9. |
| Antipsychotic drugs (1) | Higher plasma levels and Vd and lower Cl in W10-12. Reduce the dosage in F or increase dosage in M. Olanzapine is more rapidly eliminated in M than in W13. |
| Aspirin | Higher bioavailability and plasma levels of aspirin and salicylate are higher in W possibly due to lower activity of aspirin esterase, larger Vd and lower Cl in W than in M14-16. Differences disappear with OCP14. |
| Benzodiazepines | Lower initial plasma levels due to larger Vd, and possibly higher Cl, in W17-21. OC reduce their Cl. Higher plasma levels of free diazepam in W21. |
| Beta-receptor agonists | W are less sensitive4. |
| Beta blockers:  Metoprolol, propranolol | W have higher plasma levels due to a smaller Vd and slower Cl22-24. Drug exposure to metoprolol increases by OC25.  Renal Cl of atenolol and metoprolol increases during P due to enhanced hepatic metabolism26,27. |
| Calcium channel blockers | Faster Cl of verapamil28, and nifedipine29 in W. Increased bioavailability and decreased clearance of oral verapamil in W compared to M30,31. |
| Digoxin | W have higher serum digoxin concentrations due to reduced Vd and lower Cl32,33. Drug Cl increases during P34. |
| Glucocorticoids | Oral Cl and Vd of prednisolone are higher M. Prednisolone clearance was reduced by OC35-37. |
| Heparin | W had higher plasma levels and APTT values than M due to a lower Cl8,38-40. |
| Iron | Oral absorption of iron is greater in W than in M41. |
| Isosorbide Mononitrate | W had significantly higher serum plasma concentrations compared to men, probably due to the lower body weights in females42 . |
| Labetalol | Labetalol concentrations are 80% higher in W43. |
| Lidocaine | W has a larger Vd and may require a higher i.v. bolus dose than M. Higher free plasma levels in W receiving OCP, as alpha 1-acid glycoprotein levels are reduced by oestrogens21. |
| -opioid (OP3) receptor agonists (2) | Slower onset and offset of action in W2,4,44. |
| Neuromuscular blocking drugs (3) | Lower Vd, higher plasma levels, faster onset and prolonged duration in W due to the higher body fat and lower Vd4,45-50. |
| Paracetamol | Lower plasma levels and higher Cl in M due to increased activity of the glucuronidation pathway51,52. OCP increase drug clearance52. |
| Procainamide | Plasma levels are higher (30%) in W due to a lower BMI and Vd53. |
| Quinidine | Plasma protein binding decreases during P54. |
| Selective serotonin  reuptake inhibitors (4) | W present higher plasma levels, probably related to sex-related activity of various CYP enzymes7,55-57. |
| Statins | Higher plasma levels of lovastatin and simvastattin in W58. |
| Theophylline | Metabolism is faster and half-life is shorter in W than in M59. Plasma protein binding decreases and the Vd increases during P. |
| Torasemide | HigherCmax and lower Cl in W than in M60,61. |
| Tricyclic antidepressants | Free plasma concentrations of imipramine, clomipramine and nortriptyñine are higher in W and in pregnant women7,62. |
| Verapamil | Faster Cl in i.v. W probably due to the higher activity of CYP3A4 or lower activity of P-gp; lower Cl in W after oral administration28,30,63. |
| Vorapaxar | The Cmax and AUC were 30% higher in women but no dose adjustement is required64. |
| Warfarin | Higher free plasma levels in W8,65. |
| Zolpidem | Plasma levels and AUC are higher, and clearance is lower in W66 |

Abbreviations: AUC: area under the curve. BMI: body mass index. Cl: clearance. Cmax: peak plasma drug concentrations. CYP: cytochrome P450 isoforms. i.v.: intravenous. M: men. OC: oral contraceptives. P: pregnancy. P-gp: P-glycoprotein. Vd: volume of distribution. W: women.

(1): olanzapine, clozapine, pimozide, haloperidol.

(2): fentanyl, morphine, pentazocine, ramifentanil.

(3): atracurium, pancuronium, rocuronium vecuronium.

(4): citalopram, dapoxetine, escitalopram, fluoxetine, fluvoxamine, paroxetine, sertraline

**References**

1. Apfelbaum JL, Grasela TH, Hug CC Jr, McLeskey CH, Nahrwold ML, Roizen MF, Stanley TH, Thisted RA, Walawander CA, White PF. The initial clinical experience of 1819 physicians in maintaining anesthesia with propofol: characteristics associated with prolonged time to awakening. *Anesth Analg* 1993;**77**(4 Suppl):S10-S14.
2. Ciccone GK, Holdcroft A. Drugs and sex differences: a review of drugs relating anaesthesia. *Br J Anesthes* 1999;**82**:255-265.
3. Vuyk J, Oostwouder CJ, Vletter AA, Burm AG, Bovill JG. Gender differences in the pharmacokinetics of propofol in elderly patients during and after continuous infusion. *Br J Anaesth* 2001;**86**:183-188.
4. Pleym H, Spigset O, Kharasch ED, Dale O. Gender differences in drug effects: implications for anesthesiologists. *Acta Anaesthesiol Scand* 2003;**47**:241-259.
5. Hoymork SC, Raeder J. Why do women wake up faster than men from propofol anaesthesia? *Br J Anaesth* 2005;**95**:627-633.
6. Frezza M, di Padova C, Pozzato G, Terpin M, Baraona E, Lieber CS. High blood alcohol levels in women. The role of decreased gastric alcohol dehydrogenase activity and first-pass metabolism. *N Engl J Med* 1990;**322**:95-99.
7. Bigos KL, Pollock BG, Stankevich BA, Bies RR. Sex differences in the pharmacokinetics and pharmacodynamics of antidepressants: an updated review. *Gend Med* 2009;**6**:522-543.
8. Soldin OP, Chung S, Mattison. Sex differences in drug disposition. *J Biomed Biotechnol* 2011;**2011**:187103.
9. Nicolas J-M, Espie P, Molimard M. Gender and interindividual variability in pharmacokinetics. *Drug Metabolism Rev* 2009;**41**:408-421.
10. Yonkers KA, Kando JC, Cole JO, Blumenthal S. Gender differences in pharmacokinetics and pharmacodynamics of psychotropic medication. *Am J Psychiatry* 1992;**149**:587-595.
11. Mauri MC, Valonteri LS, Colasanti A, Fiorentini A, De Gaspari IF, Bareggi SR. Clinical pharmacokinetics of atypical antipsychotics. *Clin Pharmacolkinet* 2007;**46**:359-388.
12. Seeman MV. Gender differences in the prescribing of antipsychotic drugs. *Am J Psychiatry* 2004;**161**:1324-1333.
13. Bigos KL, Pollock BG, Coley KC, Miller DD, Marder SR, Aravagiri M, Kirshner MA, Schneider LS, Bies RR. Sex, race, and smoking impact olanzapine exposure. *J Clin Pharmacol* 2008;**48**:157-165.
14. Miners JO, Grugrinovich N, Whitehead AG, Robson RA, Birkett DJ. Influence of gender and oral contraceptive steroids on the metabolism of salicylic acid and acetylsalicylic acid. *Br J Clin Pharmacol* 1986;**22**:135-142.
15. Buchanan MR, Rischke JA, Butt R, Turpie AG, Hirsh J, Rosenfeld J. The sex-related differences in aspirin pharmacokinetics in rabbits and man and its relationship to antiplatelet effects. *Thromb Res* 1983;**29**:125-139.
16. Ho PC, Triggs EJ, Bourne DW, Heazlewood VJ. The effect of age and sex on the disposition of acetylsalicyl acid and its metabolites. *Br J Clin Pharmacol* 1985;**19**:675-684.
17. Greenblatt DJ, Allen MD, Harmatz JS, Shader RI. Diazepam disposition determinants. *Clin Pharmacol Ther* 1980;**27**:301-312.
18. Greenblatt DJ, Abernethy DR, Locniskar A, Harmatz JS, Limjuco RA, Shader RI. Effect of age, gender, and obesity on midazolam kinetics. *Anesthesiology* 1984;**61**:27-35
19. Ochs HR, Greenblatt DJ, Divoll M, Abernethy DR, Feyerabend H, Dengler HJ. Diazepam kinetics in relation to age and sex. *Pharmacology* 1981;**23**:24-30.
20. Lane HY, Chang YC, Chang WH, Lin SK, Tseng YT, Jann MW. Effeets of gender and age on plasma levels of clozapine and its metabolites: anaiyzed by critical statistics. *J Clin Psychiatry* 1999;**60**:36-40.
21. Routledge PA, Stargel WW, Kitchell BB, Barchowsky A, Shand DG. Sex-related differences in the plasma protein binding of lignocaine and diazepam. *Br J Clin Pharmacol* 1981;**11**:245-250.
22. Luzier AB, Killian A, Wilton JH, Wilson MF, Forrest A, Kazierad DJ. Gender-related effects on metoprolol pharmacokinetics and pharmacodynamics in healthy volunteers. *Clin Pharmacol Ther* 1999;**66**:594-601.
23. Walle T, Byington RP, Furberg CD, McIntyre KM, Vokonas PS. Biologic determinants of propranolol disposition: results from 1308 patients in the Beta-Blocker Heart Attack Trial. *Clin Pharmacol Ther* 1985;**38**:509-518.
24. Walle T, Walle UK, Cowart TD, Conradi EC. Pathway-selective sex differences in the metabolic clearance of propranolol in human subjects. *Clin Pharmacol Ther* 1989;**46**:257-263.
25. Kendall MJ, Quarterman CP, Jack DB, Beeley L. Metoprolol pharmacokinetics and the oral contraceptive pill. *Br J Clin Pharmacol* 1982;**14**:120-122.
26. Hebert MF, Carr DB, Anderson GD, Blough D, Green GE, Brateng DA, Kantor E, Benedetti TJ, Easterling TR. Pharmacokinetics and pharmacodynamics of atenolol during pregnancy and postpartum. *J Clin Pharmacol* 2005;**45**:25-33.
27. Hogstedt S, Lindberg B, Rane A. Increased oral clearance of metoprolol in pregnancy. *Eur J Clin Pharmacol* 1983;**24**:217-220.
28. Kang D, Verotta D, Krecic-Shepard ME, Modi NB, Gupta SK, Schwartz JB. Population analyses of sustained-release verapamil in patients: effects of sex, race, and smoking. *Clin Pharmacol* Ther 2003;**73**:31-40.
29. Krecic-Shepard ME, Park K, Barnas C, Slimko J, Kerwin DR, Schwartz JB. Race and sex influence clearance of nifedipine: results of a population study. *Clin Pharmacol Ther* 2000;**68**:130-142.
30. Krecic-Shepard M, Barnas C, Slimko J, Jones M, Schwartz J. Gender-specific effects on verapamil pharmacokinetics and pharmacodynamics in humans. *J Clin Pharmacol* 2000;**40**:219-230.
31. Krecic-Shepard ME, Barnas CR, Slimko J, Schwartz JB. Faster clearance of sustained release verapamil in men versus women: continuing observations on sex-specific differences after oral administration of verapamil. *Clin Pharmacol Ther* 2000;**68**:286-292.
32. Rathore SS, Curtis JP, Wang Y, Bristow MR, Krumholz HM. Association of serum digoxin concentration and outcomes in patients with heart failure. *JAMA* 2003;**289**:871-878.
33. Rathore SS, Foody JM, Wang Y, Smith GL, Herrin J, Masoudi FA, Wolfe P, Havranek EP, Ordin DL, Krumholz HM. Race, quality of care, and outcomes of elderly patients hospitalized with heart failure. *JAMA* 2003;**289**:2517-2524.
34. Luxford AM, Kellaway GS. Pharmacokinetics of digoxin in pregnancy. *Eur J Clin Pharmacol* 1983;**25**:117-121.
35. Lew KH, Ludwig EA, Milad MA, Donovan K, Middleton E Jr, Ferry JJ, Jusko WJ. Gender-based effects on methylprednisolone pharmacokinetics and pharmacodynamics. *Clin Pharmacol Ther* 1993;**54**:402-414.
36. Meffin PJ, Brooks PM, Sallustio BC. Alterations in prednisolone disposition as a result of time of administration, gender and dose. *Br J Clin Pharmacol* 1984;**17**:395-404.
37. Magee MH, Blum RA, Lates CD, Jusko WJ. Prednisolone pharmacokinetics and pharmacodynamics in relation to sex and race. *J Clin Pharmacol* 2001;**41**:1180-1189.
38. Campbell NR, Hull RD, Brant R, Hogan DB, Pineo GF, Raskob GE. Different effects of heparin in males and females. *Clin Invest Med* 1998;**21**:71-78
39. Cipolle R, Seifert R, Neilan B, Zaske DE, Haus E. Heparin kinetics: variables related to disposition and dosage. *Clin Pharmacol Ther* 1981;**29**:387-393.
40. Mattison D, Zajicek A. Gaps in knowledge in treating pregnant women. *Gend Med* 2006;**3**:169-182.
41. Jacobs A. Sex differenees in iron absorption. *Proc Nutr Soc* 1976;**35**:159-162.
42. Vree TB, Dammers E, Valducci R. Sex-related differences in the pharmacokinetics of isosorbide-5-mononitrate (60 mg) after repeated oral administration of two different original prolonged release formulations. *Int J Clin Pharmacol Ther* 2004;**42**:463-472.
43. Johnson JA, Akers WS, Herring VL, Wolfe MS, Sullivan JM. Gender differences in labetalol kinetics: importance of determining stereoisomer kinetics for racemic drugs. *Pharmacotherapy* 2000;**20**:622-628.
44. Sarton E, Olofsen E, Romberg R, den Hartigh J, Kest B, Nieuwenhuijs D, Burm A, Teppema L, Dahan A. Sex differences in morphine analgesia: an experimental study in healthy volunteers. *Anesthesiology* 2000;**93**:1245-1254.
45. Xue FS, Tong SY, Liao X, Liu JH, An G, Luo LK. Dose-response and time course of effect of rocuronium in male and female anesthetized patients. *Anesth Analg* 1997;**85**:667-671.
46. Xue FS, Liao X, Liu JH, Tong SY, Zhang YM, Zhang RJ, An G, Luo LK. Dose-response curve and time-course of effect of vecuronium in male and female patients. *Br J Anaesth* 1998;**80**:720-724.
47. Xue FS, An G, Liao X, Zou Q, Luo LK. The pharmacokinetics of vecuronium in male and female patients. *Anesth Analg* 1998;**86**:1322-1327.
48. Xue FS, Zhang YM, Liao X, Liu JH, An G. Influences of age and gender on dose response and time course of effect of atracurium in anesthetized adult patients. *J Clin Anesth* 1999;**11**:397-405.
49. Takaya T, Takeyama K, Miura M, Takiguchi M. Influence of body fat on the onset of vecuronium induced neuromuscular blockade. *Tokai J Exp Clin Med* 2001;**26**:107-111.
50. Ueno K. Gender differences in pharmacokinetics of anesthetics. *Jap J Anesthesiol* 2009;**58**:51-58.
51. Abernethy DR, Divoll M, Greenblatt DJ, Ameer B. Obesity, sex, and acetaminophen disposition. *Clin Pharmacol Ther* 1982;**31**:783-790.
52. Miners JO, Attwood J, Birkett DJ. Influence of sex and oral contraceptive steroids on paracetamol metabolism. *Br J Clin Pharmacol* 1983;**16**:503-509.
53. Koup JR, Abel RB, Smithers JA, Eldon MA, de Vries TM. Effect of age, gender and race on steady state procainamide pharmacokinetics after administration of procanbid sustained-release tablets. *Ther Drug Monit* 1998;**20**:73-77.
54. El-Eraky H, Thomas SH. Effects of sex on the pharmacokinetic and phar-macodynamic properties of quinidine. *Br J Clin Pharmacol* 2003;**56**:198-204.
55. Hiemke C, Härtter S. Pharmacokinetics of selective serotonin reuptake inhibitors. *Pharmacol Ther* 2005;**85**:11-28.
56. Preskorn SH. Clinically relevant pharmacology of selective serotonin reuptake inhibitors: an overview with emphasis on pharmacokinetics and effects on oxidative drug metabolism. *Clin Pharmacokinet* 1997;**32**(Suppl. 1):1-21.
57. Härtter S, Wetzel H, Hammes E, Torkzadeh M, Hiemke C. Nonlinear pharmacokinetics of fluvoxamine and gender differences. *Ther Drug Monit* 1998;**20**:446-449.
58. Chen ZM, Jiang LX, Chen YP, Xie JX, Pan HC, Peto R, Collins R, Liu LS; COMMIT (ClOpidogrel and Metoprolol in Myocardial Infarction Trial) collaborative group. Addition of clopidogrel to aspirin in 45,852 patients with acute myocardial infarction: randomised placebo-controlled trial. *Lancet* 2005;**366**:1607-1621.
59. Nafziger AN, Bertino Jr JS. Sex-related differences in theophylline pharmacokinetics. *Eur J Clin Pharmacol* 1989;**37**:97-100.
60. Werner D, Werner U, Meybaum A, Schmidt B, Umbreen S, Grosch A, Lestin HG, Graf B, Zolk O, Fromm MF. Determinants of steady-state torasemide pharmacokinetics: impact of pharmacogenetic factors, gender and angiotensin II receptor blockers. *Clin Pharmacokinet* 2008;**47**:323-332.
61. Werner U, Werner D, Heinbüchner S, Graf B, Ince H, Kische S, Thürmann P, König J, Fromm MF, Zolk O. Gender is an important determinant of the disposition of the loop diuretic torasemide. *J Clin Pharmacol* 2010;**50**:160-168.
62. Yonkers KA, Brawman-Mintzer O. The pharmacologic treatment of depression: is gender a critical factor? *J Clin Psychiatry* 2002;**63**:610-615.
63. Dadashzadeha SB, Javadiana B, Sadeghianb S. The Effect of Gender on the Pharmacokinetics of Verapamil and Norverapamil in Human. Biopharm. *Drug Dispos* 2006;**27**:329-334.
64. Prescribing information for vorapaxar. <https://www.merck.com/product/usa/> pi_circulars/z/zontivity/ zontivity_pi.pdf. [Accessed September 17th, 2016.]
65. Yacobi A, Stoll RG, DiSanto AR, Levy G. Intersubjeet variation of warfarin binding to protein in serum of normal subjects. *Res Commun Chem Pathol Pharmacol* 1976;**14**:743-746.
66. Greenblatt DJ, Harmatz JS, von Moltke LL, Wright CE, Durol AL, Harrel-Joseph LM, Shader RI. Comparative kinetics and response to the benzodiazepine agonists triazolam and zolpidem: evaluation of sex-dependent differences. *J Pharmacol Exp Ther*2000;**293**:435-443.

**Supplemental Table 3. Sex differences in drug pharmacodynamics**

| **Drug class** | **Outcomes** |
| --- | --- |
| Alcohol | Higher vulnerability of W to acute and chronic complications of alcoholism1 |
| Anesthetics: Propofol | W are less sensitive to propofol2. W wake up faster and require higher doses than M for the same effect2-6 |
| ACEIs | No mortality benefit in W with asymptomatic LV systolic dysfunction7 |
| Antidepressants | W respond better to selective serotonin/noradrenaline uptake inhibitors. M respond better to TCA and MAO inhibitors than W8-15 |
| Antipsychotic drugs: | More effective in W. They require lower doses to control symptoms16-18 |
| Aspirin | It has a better protective effect against stroke in W and against MI in M19. Aspirin is more active in vitro in male platelets20,21. Aspirin resistance is more frequent in W22 |
| Benzodiazepines | Diazepam impairs psychomotor skills to a greater extent in W. They should be initiated at lower dosages in W23 |
| Beta-blockers | Greater reduction in blood pressure and heart rate in W treated with metoprolol and propranolol24 |
| Digoxin | W with HF have an increased risk of mortality on digoxin therapy. W require lower doses and lower plasma levels (< 0.8 ng/ml)25-27 |
| Glucocortioids | Females are more sensitive to the effects of methylprednisolone on cortisol suppression28 |
| Heparin | W had increased partial thromboplastin time, even after weight-adjusted dosing, suggesting an increased sensitivity29 |
| Ibuprofen | Less effective in W30 |
| Lidocaine | W may require a higher i.v. bolus doses to achieve the same plasma concentration31 |
| -opioid (OP3) and * (OP2) receptor agonists (1) | W experience more pain and are more sensitive to morphine and  receptor agonists2,32-37. M require 30-60% greater dose of morphine and  receptor agonists for the same pain relief23,33-35,38 |
| Neuromuscular blocking drugs (2) | W are more sensitive and require lower (20-30%) doses than M due to a smaller Vd2,39-44. If a rapid onset of action is required the dose should be increased in M |
| Paracetamol | W displayed lower Cl and Vd compared to M45. Oral contraceptives increase drug clearance18,46 |
| rt-PA | W with acute ischemic stroke obtein more benefit from rtPA than M47-51 |
| SSRIs (3) | W respond better than M, being the preferred therapy8-10,15 |
| Verapamil | Greater reduction in blood pressure and heart rate in W52 |
| Warfarin | W need less warfarin per week than M53,54. Doses should be modified to reduce the risk of excessive anticoagulation in F |
| Zolpidem | The recommended initial dose is lower in W55 |

Abbreviations: ACEIs: angiotensin-converting enzyme inhibitors. E: estrogens. HF: heart failure. M: men. MI: myocardial infartion. OCP: oral contraceptives. rt-PA: recombinant tissue plasminogen activator. SSRIs SSRIs: selective serotonin reuptake inhibitors.

(1) alfentanyl, butorphanol*, fentanyl, morphine, nalbuphine* pentazocine*, remifentanyl.

(2) atracurium, pancuronium, rocuronium and vecuronium.

(3): citalopram, dapoxetine, escitalopram, fluoxetine, fluvoxamine, paroxetine, sertraline

**References**

1. Freire AC, Basit AW, Choudhary R, Piong CW, Merchant HA. Does sex matter? The influence of gender on gastrointestinal physiology and drug delivery. *Int J Pharm* 2011;**415**:15-28.
2. Ueno K. Gender differences in pharmacokinetics of anesthetics. *Jap J Anesthesiol* 2009;**58**:51-58.
3. Gottlieb SS, McCarter RJ, Vogel RA. Effect of beta-blockade on mortality among high-risk and low-risk patients after myocardial infarction. *N Engl J Med* 1998;**339**:489-497.
4. Hoymork SC, Raeder J. Why do women wake up faster than men from propofol anaesthesia? *Br J Anaesth* 2005;**95**:627-633.
5. Buchanan MR, Rischke JA, Butt R, Turpie AG, Hirsh J, Rosenfeld J. The sex-related differences in aspirin pharmacokinetics in rabbits and man and its relationship to antiplatelet effects. *Thromb Res* 1983;**29**:125-139
6. Gan TJ, Glass PS, Sigl J, Sebel P, Payne F, Rosow C, Embree P. Women emerge from general anesthesia with propofol/alfentanil/nitrous oxide faster than men. *Anesthesiology* 1999;**90**:1283-1287.
7. Shekelle PG1, Rich MW, Morton SC, Atkinson CS, Tu W, Maglione M, Rhodes S, Barrett M, Fonarow GC, Greenberg B, Heidenreich PA, Knabel T, Konstam MA, Steimle A, Warner Stevenson L. Efficacy of angiotensin-converting enzyme inhibitors and beta-blockers in the management of left ventricular systolic dysfunction according to race, gender, and diabetic status: a meta-analysis of major clinical trials. *J Am Coll Cardiol* 2003;**41**:1529-1538.
8. Kornstein SG, Schatzberg AF, Thase ME, Yonkers KA, McCullough JP, Keitner GI, Gelenberg AJ, Davis SM, Harrison WM, Keller MB.Gender differences in treatment response to sertraline versus imipramine in chronic depression. *Am J Psychiatry* 2000;**157**:1445-1452.
9. Baca E, Garcia-Garcia M, Porras-Chavarino A. Gender differences in treatment response to sertraline versus imipramine in patients with nonmelancholic depressive disorders. *Prog Neuropsychopharmacol Biol Psychiatry* 2004;**28**:57-65.
10. Berlanga C, Flores-Ramos M. Different gender response to serotonergic and noradrenergic antidepressants. A comparative study of the efficacy of citalopram and reboxetine. *J Affect Disord* 2006;**95**:119-123.
11. Parker G, Parker K, AustinMP, Mitchell P, Brotchie H. Gender differences in response to differing antidepressant drug classes: two negative studies. *Psychol Med* 2003;**33**:1473-1477.
12. Khan A, Brodhead AE, Schwartz KA, Kolts RL, Brown WA. Sex differences in antidepressant response in recent antidepressant clinical trials. *J Clin Psychopharmacol* 2005;**25**:318-324.
13. Yonkers KA, Brawman-Mintzer O. The pharmacologic treatment of depression: is gender a critical factor? *J Clin Psychiatry* 2002;**63**:610-615.
14. Yonkers KA. [Special issues related to the treatment of depression in women.](http://www.ncbi.nlm.nih.gov/pubmed/14700449) *J Clin Psychiatry 2003*;**64**(Suppl.18):8-13.
15. Bano S, Akhter S, Afridi MI. Gender based response to fluoxetine hydrochloride medication in endogenous depression. *J Coll Physicians Surg Pak* 2004;**14**:161-165.
16. Yonkers KA, Kando JC, Cole JO, Blumenthal S. Gender differences in pharmacokinetics and pharmacodynamics of psychotropic medication. *Am J Psychiatry* 1992;**149**:587-595.
17. Melkersson KI, Hulting AL, Rane AJ. Dose requirement and prolactin elevation of antipsychotics in male and female patients with schizophrenia or related psychoses. *Br J Clin Pharmacol* 2001;**51**:317-324.
18. Rademaker M. Do women have more adverse drug reactions? *Am J Clin Dermatol* 2001;**2**:349-351.
19. Berger JS, Roncaglioni MC, Avanzini F, Pangrzzi I, Tognoni G, Brown DL. Aspirin for the primary prevention of cardiovascular events in women and men: a sexspecific meta-analysis of randomized controlled trials. *JAMA* 2006;**295**:306-313.
20. Escolar G, Bastida E, Garrido M, Rodríguez-Gómez J, Castillo R, Ordinas A. Sex-related differences in the effects of aspirin on the interaction of platelets with subendothelium. *Thromb Res* 1986;**44**:837-847
21. Harrison MJ, Weisblatt E. A sex difference in the effect of aspirin on “spontaneous” platelet aggregation in whole blood. *Thromb Haemost* 1983;**50**:773-774.
22. Bailey A, Scantlebury DC, Smyth SS. Thrombosis and antithrombotic therapy in women. *Arterioscler Thromb Vasc Biol* 2009;**29**:284-288.
23. Pleym H, Spigset O, Kharasch ED, Dale O. Gender differences in drug effects: implications for anesthesiologists. *Acta Anaesthesiol Scand* 2003;**47**:241-259.
24. Luzier AB, Killian A, Wilton JH, Wilson MF, Forrest A, Kazierad DJ. Gender-related effects on metoprolol pharmacokinetics and pharmacodynamics in healthy volunteers. *Clin Pharmacol Ther* 1999;**66**:594-601.
25. Luxford AM, Kellaway GS. Pharmacokinetics of digoxin in pregnancy. *Eur J Clin Pharmacol* 1983;**25**:117-121.
26. Rathore SS, Wang Y, Krumholz HM. Sex-based differences in the effect of digoxin for the treatment of heart failure. *N Engl J Med* 2002;**347**:1403-1411.
27. Regitz-Zagrosek V. Therapeutic implications of the gender-specific aspects of cardiovascular disease. *Nat Rev Drug Discov* 2006;**5**:425-438.
28. Lew KH, Ludwig EA, Milad MA, Donovan K, Middleton E Jr, Ferry JJ, Jusko WJ. Gender-based effects on methylprednisolone pharmacokinetics and pharmacodynamics. *Clin Pharmacol Ther* 1993**;54**:402-414.
29. Granger CB, J Hirsh, R.D Califf. Activated partial thromboplastin time and outcome after thrombolytic therapy for acute myocardial infarction: results from the GUSTO-I trial. *Circulation* 1996:**93**;870-878.
30. Walker JS, Carmody JJ. Experimental pain in healthy human subjects: gender differences in nociception and in response to ibuprofen. *Anesth Analg* 1998;**86**:1257-1262.
31. Routledge PA, Stargel WW, Kitchell BB, Barchowsky A, Shand DG. Sex-related differences in the plasma protein binding of lignocaine and diazepam. *Br J Clin Pharmacol* 1981;**11**:245-250.
32. Sarton E, Olofsen E, Romberg R, den Hartigh J, Kest B, Nieuwenhuijs D, Burm A, Teppema L, Dahan A. Sex differences in morphine analgesia: an experimental study in healthy volunteers. *Anesthesiology* 2000;**93**:1245-1254.
33. Gear RW, Gordon NC, Heller PH, Paul S, Miaskowski C, Levine JD. Gender difference in analgesic response to the kappa-opioid pentazocine. *Neurosci Lett* 1996;**205**:207-209.
34. Gear RW, Gordon NC, Hossaini-Zadeh M, Lee JS, Miaskowski C, Paul SM, Levine JD. A subanalgesic dose of morphine eliminates nalbuphine antianalgesia in postoperative pain. *J Pain* 2008;**9**:337-341.
35. Gear RW, Miaskowski C, Gordon NC, Paul SM, Heller PH, Levine JD. Kappa-opioids produce significantly greater analgesia in women than in men. *Nat Med* 1996;**2**:1248-1250.
36. Cepeda MD, Carr D. Women experience more pain and require more morphine than men to achieve a similar degree of analgesia. *Anesthesia and Analgesia* 2003;**97**:1464-1468.
37. Zubieta JK, Smith YR, Bueller JA, Xu Y, Kilbourn MR, Jewett DM, Meyer CR, Koeppe RA, Stohler CS. mu-opioid receptor-mediated antinociceptive responses differ in men and women. *J Neurosci* 2002;**22**:5100-5107.
38. Craft RM. Sex differences in drug and non-drug-induced analgesia. *Life Sci* 2003;**72**:2675-2688.
39. Xue FS, Liao X, Liu JH, Tong SY, Zhang YM, Zhang RJ, An G, Luo LK. Dose-response curve and time-course of effect of vecuronium in male and female patients. *Br J Anaesth* 1998;**80**:720-724.
40. Xue FS, Tong SY, Liao X, Liu JH, An G, Luo LK. Dose-response and time course of effect of rocuronium in male and female anesthetized patients. *Anesth Analg* 1997;**85**:667-671.
41. Xue FS, Zhang YM, Liao X, Liu JH, An G. Influences of age and gender on dose response and time course of effect of atracurium in anesthetized adult patients. *J Clin Anesth* 1999;**11**:397-405.
42. Takaya T, Takeyama K, Miura M, Takiguchi M. Influence of body fat on the onset of vecuronium induced neuromuscular blockade. *Tokai J Exp Clin Med* 2001;**26**:107.
43. Gan TJ, Glass PS, Sigl J, Sebel P, Payne F, Rosow C, Embree P. Women emerge from general anesthesia with propofol/alfentanil/nitrous oxide faster than men. *Anesthesiology* 1999;**90**:1283-1287.
44. Semple P, Hope DA, Clyburn P, Rodbert A. Relative potency of vecuronium in male and female patients in Britain and Australia. *Br J Anaesth* 1994;**72**:190-194.
45. Abernethy DR, Divoll M, Greenblatt DJ, Ameer B. Obesity, sex, and acetaminophen disposition. *Clin Pharmacol Ther* 1982;**31**:783-790.
46. Miners JO, Attwood J, Birkett DJ. Influence of sex and oral contraceptive steroids on paracetamol metabolism. *Br J Clin Pharmacol* 1983;**16**:503-509.
47. Weaver WD, White HD, Wilcox RG, Aylward PE, Morris D, Guerci A, Ohman EM, Barbash GI, Betriu A, Sadowski Z, Topol EJ, Califf RM; for the GUSTO-I Investigators. Comparisons of characteristics and outcomes among women and men with acute myocardial infarction treated with thrombolytic therapy. GUSTO-I Investigators. *JAMA* 1996;**275**:777-782.
48. Moscucci M, Fox KA, Cannon CP, KleinW, López-Sendón J, Montalescot G, et al. Predictors of major bleeding in acute coronary syndromes: the Global Registry of Acute Coronary Events (GRACE). *Eur Heart J* 2003;**24**:1815-23.
49. Razakjr OA, Tan HC, Yip WL, Lim YT. Predictors of bleeding complications and thrombocytopenia with the use of abciximab during percutaneous coronary intervention. *J Interv Cardiol* 2005;**18**:33-37.
50. Reynolds HR, Farkouh ME, Lincoff AM, Hsu A, Swahn E, Sadowski ZP, White JA, Topol EJ, Hochman JS; GUSTO V Investigators. Impact of female sex on death and bleeding after fibrinolytic treatment of myocardial infarction in GUSTO V. *Arch Intern Med* 2007;**167**:2054 -2060.
51. Mehta RH, Stebbins AS, Lopes RD, Califf RM, Pieper KS, Armstrong PW, Van de Werf F, Hochman JS, White HD, Topol EJ, Alexander JH, Granger CB. Comparison of incidence of bleeding and mortality of men versus women with ST-elevation myocardial infarction treated with fibrinolysis. *Am J Cardiol* 2012;**109**:320 -326.
52. Krecic-Shepard M, Barnas C, Slimko J, Jones M, Schwartz J. Gender-specific effects on verapamil pharmacokinetics and pharmacodynamics in humans. *J Clin Pharmacol* 2000;**40**:219-230.
53. Garcia D, Regan S, Crowther M, Hughes RA, Hylek EM. Warfarin maintenance dosing patterns in clinical practice: implications for safer anticoagulation in the elderly population. *Chest* 2005;**127**:2049-2056.
54. Ansell J, Hirsh J, Poller L, [Bussey H](https://www.ncbi.nlm.nih.gov/pubmed/?term=Bussey H%5BAuthor%5D&cauthor=true&cauthor_uid=15383473), [Jacobson A](https://www.ncbi.nlm.nih.gov/pubmed/?term=Jacobson A%5BAuthor%5D&cauthor=true&cauthor_uid=15383473), [Hylek E](https://www.ncbi.nlm.nih.gov/pubmed/?term=Hylek E%5BAuthor%5D&cauthor=true&cauthor_uid=15383473).. The pharmacology and management of the vitamin K antagonists: The Seventh ACCP Conference on Antithrombotic and Thrombolytic Therapy: Evidence-Based Guidelines.*Chest Guidelines* 2004;**126**:204S-233S.
55. Ambien® Prescribing Information. www.accessdata.fda.gov/drugsatfda_docs/label/2008/019908s027lbl.pdf. Accessed: November 4th, 2016.

**Supplemental Table 4.** **Examples of sex differences in adverse drug reactions (ADRs)**

| **Drug class** | **Outcomes in females** |
| --- | --- |
| Analgesic drugs | W report more adverse effects to perioperative analgesic drugs1. |
| Anaphylactic shock | Anaphylactic shock induced by neuromuscular blocking agents, hypnotics, opioids and benzodiazepines is more frequent in W2. |
| Anesthetic drugs | W are more prone to ADR postoperatively2-4 |
| Angiotensin converting enzyme inhbitors | Dry cough is 2-3 times more frequent in W5-7. No gender preference for angioedema/urticaria8. |
| Anorectics | Cardiac valvulopathy is more frequent in W exposed to phentermine, dexfenfluramine or fenfluramine9. |
| Antiarrhythnmic drugs | Higher risk of QT prolongation and TdP in W10. |
| Anticoagulants: | More frequent and severe bleedings in W11-19 |
| H1-Antihistamines | W are more vulnerable to sedation and drowsiness20-22 |
| Antiplatelets | More frequent and severe bleedings in W23 |
| Antipsychotics | W present more extrapyramidal and anticholinergic effects and QTc prolongation. M reported more sexual problems24-27 |
| Aspirin | Increased risk of bleeding in W28. More ulcer complications in M29 |
| Beta blockers | Enhanced BP lowering and heart rate reduction with metoprolol in W30. |
| Benzodiazepines | Diazepam impaired the psychomotor skills more in W than in M31. Dependency is more frequent in W26 |
| Calcium channel blockers | Higher risk of edema in W32. Women taking OCP and diazepam during menstruation become relatively intoxicated33 |
| Digoxin | Higher mortality in F with heart failure34. Digoxin plasma levels < 0.8 ng/mL are recommended in W35 |
| Diuretics | Higher rates of hospitalizations due to hypo-osmolarity, hypokalemia and hyponatremia and higher risk of arrhythmias in W15,35-39 |
| Drug-induced TdP | W have a longer QTc intervals and devep TdP more frequently than M40-44 |
| GPIIb/IIIa inhibitors | W experience more bleeding than M23,45 |
| Heparins | W present higher bleeding risk12,46,47 |
| Opioid receptor agonists | W experience more ADRs (nausea and vomiting, respiratory depression) despite smaller dose requirements for pain control48-52 |
| NSAIDs | M display a higher prevalence of ADRs than W29,53-55 |
| Paracetamol | Acute liver failure die to paracetamol overdose is more common in W56 |
| Procainamide | Systemic lupus erythematosus more common in W57,58 |
| Skin diseases | W > M (systemic lupus erythematosus and photosensitivity57,59 |
| Statins | Myopathy is more frequent in older W with low body weight60,61 |
| Thiazides | More hyponatremia and hypokalemia in W62 |
| Thiazolidinediones | Double the risk of fractures among diabetic F, but not among M63-66 |
| Thrombolytics | Higher risk of bleeding67-69 and intracranial hemorrhagic in W70,71 |
| Unfractioned heparin | W develop higher plasma levels and higher bleeding risk12,19 |
| Zolpidem | To reduce the risk of morning-after activity impairment decrease the dose of zolpidem by 50% in W72 |

Abbreviations: ACEIs: angiotensin-converting enzyme inhibitors. E: estrogens. HF: heart failure. 5-HTTT: serotonin transporter. ADR: adverse drug reactions. BP: blood pressure. CV: cardiovascular. GP: glycoprotein. NSAID: non-steroidal anti-inflammatory drugs. OC: oral contraceptives. QTc: corrected QT interval. TdP: torsades de pointes. W: women.

**References**

1. Richardson J, Holdcroft A. Results of forty years Yellow Card reporting for commonly used perioperative analgesic drugs. *Pharmacoepidemiol Drug Saf* 2007;**16**:687-694.
2. Ciccone GK, Holdcroft A. Drugs and sex differences: a review of drugs relating anaesthesia. *Br J Anesthes* 1999;**82**:255-265.
3. Kando JC, Yonkers KA, Cole JO. Gender as a risk factor for adverse events to medications. *Drugs* 1995;**50**:1-6.
4. Buchanan MR, Rischke JA, Butt R, Turpie AG, Hirsh J, Rosenfeld J. The sex-related differences in aspirin pharmacokinetics in rabbits and man and its relationship to antiplatelet effects. *Thromb Res* 1983;**29**:125-139.
5. Os I, Bratland B, Dahlof B, Gisholt K, Syvertsen JO, Tretli S. Female sex as an important determinant of lisinopril induced-cough. *Lancet* 1992;**339**:372.
6. Strocchi E, Malini PL, Valtancoli G, Ricci C, Bassein L, Ambrosioni E. Cough during treatment with angiotensin-converting enzyme inhibitors. Analysis of predisposing factors. *Drug Invest* 1992;**4**:69-72.
7. Strocchi E, Valtancoli G, Ambrosioni E. The incidence of cough during treatment with angiotensin converting enzyme inhibitors. *J Hypertens* 1989:**7**(Suppl.);S308-309.
8. Pillans PI, Coulter DM, Black P. Angiooedema and urticaria with angiotensin converting enzyme inhibitors. *Eur J Clin Pharmacol* 1996;**51**:123-126.
9. Naqvi TZ, Gross SB. Anorexigen-induced cardiac valvulopathy and female gender. *Curr Womens Health Rep* 2003;**3**:116-125.
10. Johnson JA, Akers WS, Herring VL, Wolfe MS, Sullivan JM. Gender differences in labetalol kinetics: importance of determining stereoisomer kinetics for racemic drugs. *Pharmacotherapy* 2000;**20**:622-628.
11. [Alexander JH](http://www.ncbi.nlm.nih.gov/pubmed/?term=Alexander JH%5BAuthor%5D&cauthor=true&cauthor_uid=21780946), [Lopes RD](http://www.ncbi.nlm.nih.gov/pubmed/?term=Lopes RD%5BAuthor%5D&cauthor=true&cauthor_uid=21780946), [James S](http://www.ncbi.nlm.nih.gov/pubmed/?term=James S%5BAuthor%5D&cauthor=true&cauthor_uid=21780946), [Kilaru R](http://www.ncbi.nlm.nih.gov/pubmed/?term=Kilaru R%5BAuthor%5D&cauthor=true&cauthor_uid=21780946), [He Y](http://www.ncbi.nlm.nih.gov/pubmed/?term=He Y%5BAuthor%5D&cauthor=true&cauthor_uid=21780946), [Mohan P](http://www.ncbi.nlm.nih.gov/pubmed/?term=Mohan P%5BAuthor%5D&cauthor=true&cauthor_uid=21780946), [Bhatt DL](http://www.ncbi.nlm.nih.gov/pubmed/?term=Bhatt DL%5BAuthor%5D&cauthor=true&cauthor_uid=21780946), [Goodman S](http://www.ncbi.nlm.nih.gov/pubmed/?term=Goodman S%5BAuthor%5D&cauthor=true&cauthor_uid=21780946), [Verheugt FW](http://www.ncbi.nlm.nih.gov/pubmed/?term=Verheugt FW%5BAuthor%5D&cauthor=true&cauthor_uid=21780946), [Flather M](http://www.ncbi.nlm.nih.gov/pubmed/?term=Flather M%5BAuthor%5D&cauthor=true&cauthor_uid=21780946),[Huber K](http://www.ncbi.nlm.nih.gov/pubmed/?term=Huber K%5BAuthor%5D&cauthor=true&cauthor_uid=21780946), [Liaw D](http://www.ncbi.nlm.nih.gov/pubmed/?term=Liaw D%5BAuthor%5D&cauthor=true&cauthor_uid=21780946), [Husted SE](http://www.ncbi.nlm.nih.gov/pubmed/?term=Husted SE%5BAuthor%5D&cauthor=true&cauthor_uid=21780946), [Lopez-Sendon J](http://www.ncbi.nlm.nih.gov/pubmed/?term=Lopez-Sendon J%5BAuthor%5D&cauthor=true&cauthor_uid=21780946), [De Caterina R](http://www.ncbi.nlm.nih.gov/pubmed/?term=De Caterina R%5BAuthor%5D&cauthor=true&cauthor_uid=21780946), [Jansky P](http://www.ncbi.nlm.nih.gov/pubmed/?term=Jansky P%5BAuthor%5D&cauthor=true&cauthor_uid=21780946), [Darius H](http://www.ncbi.nlm.nih.gov/pubmed/?term=Darius H%5BAuthor%5D&cauthor=true&cauthor_uid=21780946), [Vinereanu D](http://www.ncbi.nlm.nih.gov/pubmed/?term=Vinereanu D%5BAuthor%5D&cauthor=true&cauthor_uid=21780946), [Cornel JH](http://www.ncbi.nlm.nih.gov/pubmed/?term=Cornel JH%5BAuthor%5D&cauthor=true&cauthor_uid=21780946),[Cools F](http://www.ncbi.nlm.nih.gov/pubmed/?term=Cools F%5BAuthor%5D&cauthor=true&cauthor_uid=21780946), [Atar D](http://www.ncbi.nlm.nih.gov/pubmed/?term=Atar D%5BAuthor%5D&cauthor=true&cauthor_uid=21780946), [Leiva-Pons JL](http://www.ncbi.nlm.nih.gov/pubmed/?term=Leiva-Pons JL%5BAuthor%5D&cauthor=true&cauthor_uid=21780946), [Keltai M](http://www.ncbi.nlm.nih.gov/pubmed/?term=Keltai M%5BAuthor%5D&cauthor=true&cauthor_uid=21780946), [Ogawa H](http://www.ncbi.nlm.nih.gov/pubmed/?term=Ogawa H%5BAuthor%5D&cauthor=true&cauthor_uid=21780946), [Pais P](http://www.ncbi.nlm.nih.gov/pubmed/?term=Pais P%5BAuthor%5D&cauthor=true&cauthor_uid=21780946), [Parkhomenko A](http://www.ncbi.nlm.nih.gov/pubmed/?term=Parkhomenko A%5BAuthor%5D&cauthor=true&cauthor_uid=21780946), [Ruzyllo W](http://www.ncbi.nlm.nih.gov/pubmed/?term=Ruzyllo W%5BAuthor%5D&cauthor=true&cauthor_uid=21780946), [Diaz R](http://www.ncbi.nlm.nih.gov/pubmed/?term=Diaz R%5BAuthor%5D&cauthor=true&cauthor_uid=21780946), [White H](http://www.ncbi.nlm.nih.gov/pubmed/?term=White H%5BAuthor%5D&cauthor=true&cauthor_uid=21780946), [Ruda M](http://www.ncbi.nlm.nih.gov/pubmed/?term=Ruda M%5BAuthor%5D&cauthor=true&cauthor_uid=21780946), [Geraldes M](http://www.ncbi.nlm.nih.gov/pubmed/?term=Geraldes M%5BAuthor%5D&cauthor=true&cauthor_uid=21780946), [Lawrence J](http://www.ncbi.nlm.nih.gov/pubmed/?term=Lawrence J%5BAuthor%5D&cauthor=true&cauthor_uid=21780946), [Harrington RA](http://www.ncbi.nlm.nih.gov/pubmed/?term=Harrington RA%5BAuthor%5D&cauthor=true&cauthor_uid=21780946), [Wallentin L](http://www.ncbi.nlm.nih.gov/pubmed/?term=Wallentin L%5BAuthor%5D&cauthor=true&cauthor_uid=21780946); [APPRAISE-2 Investigators](http://www.ncbi.nlm.nih.gov/pubmed/?term=APPRAISE-2 Investigators%5BCorporate Author%5D). Apixaban with Antiplatelet Therapy after Acute Coronary Syndrome. *N Engl J Med* 1022;**365**:699-708.
12. Moscucci M, Fox KA, Cannon CP, Klein W, Lopez-Sendon J, Montalescot G, White K, Goldberg RJ. Predictors of major bleeding in acute coronary syndromes: the Global Registry of Acute Coronary Events (GRACE). *Eur Heart J* 2003;**24**:1815-1823.
13. Schwartz JB. The current state of knowledge on age, sex, and their interactions on clinical pharmacology. *Clin Pharmacol Ther* 2007;**82**:87-96.
14. Schwartz JB. The influence of sex on pharmacokinetics [published correction appears in Clin Pharmacokinet. 2004;43(11):732]. *Clin Pharmacokinet* 2003;**42**:107-121.
15. Rodenburg EM, Stricker BH, Visser LE. Sex-related differences in hospital admissions attributed to adverse drug reactions in the Netherlands. *Br J Clin Pharmacol* 2010;**71**:95-104.
16. van der Meer FJ, Rosendaal FR, Vandenbroucke JP, Briët E. Bleeding complications in oral anticoagulant therapy. An analysis of risk factors. *Arch Intern Med* 1993;**153**:1557-1562.
17. Whitley HP, Fermo JD, Chumney EC, Brzezinski WA. Effect of patient-specific factors on weekly warfarin dose. *Ther Clin Risk Manag* 2007;**3**:499-504.
18. Kuijer PM, Hutten BA, Prins MH, Büller HR. Prediction of the risk of bleeding during anticoagulant treatment for venous thromboembolism. *Arch Intern Med* 1999;**159**:457-460.
19. Walker AM, Jick H. Predictors of bleeding during heparin therapy. *JAMA* 1980;**244**:1209-1212.
20. Soldin OP, Mattison. Sex differences in pharmacokinetics and pharmacodynamics. *Clin Pharmacokinet* 2009;**48**:143-158.
21. Soldin OP, Chung S, Mattison. Sex differences in drug disposition. *J Biomed Biotechnol* 2011;**2011**:187103.
22. Nicolas J-M, Espie P, Molimard M. Gender and interindividual variability in pharmacokinetics. *Drug Metabolism Rev* 2009;**41**:408-421.
23. Alexander KP, Chen AY, Newby LK, Schwartz JB, Redberg RF, Hochman JS, Roe MT, Gibler WB, Ohman EM, Peterson ED. Sex differences in major bleeding with glycoprotein IIb/IIIa inhibitors: results from the CRUSADE (Can Rapid risk stratification of Unstable angina patients Suppress ADverse outcomes with Early implementation of the ACC/AHA guidelines) initiative. *Circulation* 2006;**114**:1380-1387.
24. Harris RZ, Benet LZ, Schwartz JB. Gender effects in pharmacokinetics and pharmacodynamics. *Drugs* 1995;**50**:222-239.
25. Barbui C, Nosè M, Bindman J, Schene A, Becker T, Mazzi MA, Kikkert M, Camara J, Born A, Tansella M. Sex differences in the subjective tolerability of antipsychotic drugs. *J Clin* *Psychopharmacol* 2005;**25**:521-526.
26. Yonkers KA, Kando JC, Cole JO, Blumenthal S. Gender differences in pharmacokinetics and pharmacodynamics of psychotropic medication. *Am J Psychiatry* 1992;**149**:587-595.
27. Chouinard G, Annable L. Pimozide in the treatment of newly admitted schizophrenic patients. *Psychopharmacology* 1982;**76**:13-19.
28. Ridker PM, Cook NR, Lee I-M, Gordon D, Gaziano JM, Manson JE, Hennekens CH, Buring JE. A randomized trial of low-dose aspirin in the primary prevention of cardiovascular disease in women. *N Eng J Med* 2005;**352**:1293-1304.
29. Hansen JM, Hallas J, Lauritsen JM, Bytzer P. Non-steroidal anti-inflammatory drugs and ulcer complications: a risk factor analysis for clinical decision-making. *Scand J Gastroenterol* 1996;**31**:126-130.
30. Ghali JK, Pina IL, Gottlieb SS, Deedwania PC, Wikstrand JC. Metoprolol CR/XL in female patients with heart failure: analysis of the experience in metoprolol extended-release randomized intervention trial in heart failure (MERIT-HF). *Circulation* 2002;**105**:1585-1591.
31. Palva ES. Gender-related differences in diazepam effects on performance. *Med Biol* 1985;**63**:92-95.
32. Kloner RA, Sowers JR, DiBona GF, Gaffney M, Wein M, for the Amlodipine Cardiovascular Community Trial Study Group. Sex- and age-related antihypertensive effects of amlodipine. *Am J Cardiol* 1996;**77**:713-722.
33. Yonkers KA, Brawman-Mintzer O. The pharmacologic treatment of depression: is gender a critical factor? *J Clin Psychiatry* 2002;**63**:610-615
34. Rathore SS, Curtis JP, Wang Y, Bristow MR, Krumholz HM. Association of serum digoxin concentration and outcomes in patients with heart failure. *JAMA* 2003;**289**:871-878.
35. Regitz-Zagrosek V. Therapeutic implications of the gender-specific aspects of cardiovascular disease. *Nat Rev Drug Discov* 2006;**5**:425-438.
36. Werner D, Werner U, Meybaum A, Schmidt B, Umbreen S, Grosch A, Lestin HG, Graf B, Zolk O, Fromm MF. Determinants of steady-state torasemide pharmacokinetics: impact of pharmacogenetic factors, gender and angiotensin II receptor blockers. *Clin Pharmacokinet* 2008;**47**:323-332.
37. Werner U, Werner D, Heinbüchner S, Graf B, Ince H, Kische S, Thürmann P, König J, Fromm MF, Zolk O. Gender is an important determinant of the disposition of the loop diuretic torasemide. *J Clin Pharmacol* 2010;**50**:160-168.
38. Chapman MD, Hanrahan R, McEwen J, Marley JE. Hyponatraemia and Hypokalaemia Due to Indapamide. *Med J Aust* 2002;**176**:219-221.
39. Sharabi Y, Illan R, Kamari Y, Cohen H, Nadler M, Messerli FH, Grossman E. Diuretic induced hyponatraemia in elderly hypertensive women. *J Hum Hypertens* 2002;**16**:631-635.
40. Drici MD, Clement N. Is gender a risk factor for adverse drug reactions? The example of drug-induced long QT syndrome. *Drug Safe* 2001;**24**:575-585.
41. Fitzgerald PT, Ackerman MJ. Drug-induced torsades de pointes: the evolving role of pharmacogenetics. *Heart Rhythm* 2005;**2**(2 Suppl):S30-S37.
42. Makkar RR, Fromm BS, Steinman RT, Meissner MD, Lehmann MH. Female gender as a risk factor for torsades de pointes associated with cardiovascular drugs. *JAMA* 1993;**270**:2590-2597.
43. Yap YG and Camm AJ. Drug induced QT prolongation and torsades de pointes. *Heart* 2003;**89**:1363-1372.
44. Kannankeril P, Roden DM, Darbar D. Drug-induced long QT syndrome. *Pharmacol Rev* 2010;**62**:760-781.
45. Boersma E, Harrington RA, Moliterno DJ, White H, Theroux P, Van de WF, de TA, Armstrong PW, Wallentin LC, Wilcox RG, Simes J, Califf RM, Topol EJ, Simoons ML. Platelet glycoprotein IIb/IIIa inhibitors in acute coronary syndromes: a meta-analysis of all major randomised clinical trials. *Lancet* 2002;**359**:189-198.
46. Walker AM, Jick H. Predictors of bleeding during heparin therapy. *JAMA* 1980;**244**:1209-1212.
47. Campbell NR, Hull RD, Brant R, Hogan DB, Pineo GF, Raskob GE. Different effects of heparin in males and females. *Clin Invest Med* 1998;**21**:71-78
48. Ueno K, Sato H. Sex-Related Differences in Pharmacokinetics and Pharmacodynamics of Anti-Hypertensive Drugs. *Hypertens Res* 2012;**35**:245-250.
49. Pleym H, Spigset O, Kharasch ED, Dale O. Gender differences in drug effects: implications for anesthesiologists. *Acta Anaesthesiol Scand* 2003;**47**:241-259.
50. Cepeda MD, Carr D. Women experience more pain and require more morphine than men to achieve a similar degree of analgesia. *Anesthesia and Analgesia* 2003;**97**:1464-1468.
51. Bijur PE, Esses D, Birnbaum A, Chang AK, Schechter C, Gallagher EJ. Responses to morphine in male and female patients: analgesia and adverse events. *Clin J Pain* 2008;**24**:192-198.
52. Craft RM. Sex differences in drug and non-drug-induced analgesia. *Life Sci* 2003;**72**:2675-2688.
53. Franconi F, Brunelleschi S, Steardo L, Cuomo V. Gender differences in drug responses. *Pharmacol Res* 2007;**55**:81-95.
54. Franconi F, Carru C, Malorni W, Vella S, Mercuro G. The Effect of Sex/Gender on Cardiovascular Pharmacology. *Curr Pharm Des* 2011;**17**:1095-1107.
55. Neutel CI, Maxwell CJ, Appel WC. Differences between males and females in risk of NSAID-related severe gastrointestinal events. *Pharmacoepidemiol Drug Saf* 1999;**8**:501-507.
56. Ostapowicz G, Fontana RJ, Schiødt FV, Larson A, Davern TJ, Han SH, McCashland TM, Shakil AO, Hay JE, Hynan L, Crippin JS, Blei AT, Samuel G, Reisch J, Lee WM; U.S. Acute Liver Failure Study Group. Results of a prospective study of acute liver failure at 17 tertiary care centers in the United States. *Ann Intern Med* 2002;**137**:947-954.
57. Vedove CD, Del Giglio M, Schena D, Girolomoni G. Drug-induced lupus erythematosus. *Arch Dermatol Res* 2009;**301**:99-105.
58. Cameron HA, Ramsay LE. The lupus syndrome induced by hydralazine: a common complication with low dose treatment. *Br Med J (Clin Res Ed)* 1984;**289**:410-412.
59. Rademaker M. Do women have more adverse drug reactions? *Am J Clin Dermatol* 2001**;2**:349-351.
60. Sathasivam S. Statin induced myotoxicity. *Eur J Intern Med* 2012;**23**:317-324.
61. [Bang CN](http://www.ncbi.nlm.nih.gov/pubmed/?term=Bang CN%5BAuthor%5D&cauthor=true&cauthor_uid=24464306), [Okin PM](http://www.ncbi.nlm.nih.gov/pubmed/?term=Okin PM%5BAuthor%5D&cauthor=true&cauthor_uid=24464306). Statin treatment, new-onset diabetes, and other adverse effects: a systematic review. [*Curr Cardiol Rep*](http://www.ncbi.nlm.nih.gov/pubmed/24464306)2014;**16**:461.
62. Tamargo J, Segura J, Ruilope LM. [Diuretics in the treatment of hypertension. Part 1: thiazide and thiazide-like diuretics.](http://www.ncbi.nlm.nih.gov/pubmed/24444254) *Expert Opin Pharmacother* 2014;**15**:527-547.
63. Loke YK, Singh S, Furberg CD. Long-term use of thiazolidinediones and fractures in type 2 diabetes: a meta-analysis. *CMAJ* 2009;**180**:32-39.
64. Meier C, Kraenzlin ME, Bodmer M, Jick SS, Jick H, Meier CR. Use of thiazolidinediones and fracture risk. *Arch Intern Med* 2008;**168**:820-825.
65. Nathan DM, Buse JB, Davidson MB, Ferrannini E, Holman RR, Sherwin R, Zinman B, American Diabetes Association; European Association for Study of Diabetes. Medical management of hyperglycemia in type 2 diabetes: a consensus algorithm for the initiation and adjustment of therapy: a consensus statement of the American Diabetes Association and the European Association for the Study of Diabetes. *Diabetes Care* 2009;**32**:193-203.
66. Home PD, Pocock SJ, Beck-Nielsen H, Curtis PS, Gomis R, Hanefeld M, Jones NP, Komajda M, McMurray JJ, RECORD Study Team. Rosiglitazone evaluated for cardiovascular outcomes in oral agent combination therapy for type 2 diabetes (RECORD): a multicentre, randomised, open-label trial. *Lancet* 2009;**373**:2125-2135.
67. James SK, Stenestrand U, Lindbäck J, Carlsson J, Scherstén F, Nilsson T, Wallentin L, Lagerqvist B, SCAAR Study Group. Long-term safety and efficacy of drug-eluting versus bare-metal stents in Sweden. *N Engl J Med* 2009;**360**:1933-1945.
68. Mehilli J, Ndrepepa G, Kastrati A, Neumann FJ, ten Berg J, Bruskina O, Dotzer F, Seyfarth M, Pache J, Kufner S, Dirschinger J, Berger PB, Schomig A. Sex and effect of abciximab in patients with acute coronary syndromes treated with percutaneous coronary interventions: results from Intracoronary Stenting and Antithrombotic Regimen: Rapid Early Action for Coronary Treatment 2 trial. *Am Heart J* 2007;**154**:158.e1-7
69. Razakjr OA, Tan HC, Yip WL, Lim YT. Predictors of bleeding complications and thrombocytopenia with the use of abciximab during percutaneous coronary intervention. *J Interv Cardiol* 2005;**18**:33-37.
70. White HD, Barbash GI, Modan M, Simes J, Diaz R, Hampton JR, Heikkilä J, Kristinsson A, Moulopoulos S, Paolasso EA, et al. After correcting for worse baseline characteristics, women treated with thrombolytic therapy for acute myocardial infarction have the same mortality and morbidity as men except for a higher incidence of hemorrhagic stroke. *Circulation* 1993;**88**:2097-2103.
71. Gurwitz JH, Gore JM, Goldberg RJ, Barron HV, Breen T, Rundle AC, Sloan MA, French W, Rogers WJ. Risk for intracranial haemorrhage after tissue plasminogen activator treatment for acute myocardial infarction. Participants in national registry of myocardial infarction 2. *Ann Intern Med* 1998;**129**:597-604.
72. Greenblatt DJ, Harmatz JS, von Moltke LL, Wright CE, Durol AL, Harrel-Joseph LM, Shader RI. Comparative kinetics and response to the benzodiazepine agonists triazolam and zolpidem: evaluation of sex-dependent differences. *J Pharmacol Exp Ther*2000;**293**:435-443.
